# Supplementary material for: Association between Galectin-3 levels within central and peripheral venous blood, and adverse left ventricular remodelling after first acute myocardial infarction
Source: PubMed Central journal article supplement (PMC6739356; doi:10.1038/s41598-019-49511-4), 2019-09-11

## **Association between Galectin-3 levels within central and peripheral venous blood, and adverse left ventricular remodelling after first acute myocardial infarction**

Olivera M. Andrejić<sup>a</sup>, Rada M. Vučić<sup>b,c</sup>, Milan Pavlović<sup>d,i</sup>, Lana McClements<sup>f</sup>, Dragana Stokanović<sup>g</sup>, Tatjana Jevtović –Stoimenov<sup>h</sup>, Valentina N. Nikolić<sup>g</sup>

<sup>a</sup>Clinic for Pulmonary Diseases, Clinical Centre Kragujevac, Zmaj Jovina Street 30, 34000 Kragujevac, Serbia

<sup>b</sup>University of Kragujevac, Serbia, Faculty of Medical Sciences, Department of Internal medicine, Svetozara Markovica Street 69, 34000 Kragujevac, Serbia

<sup>c</sup>Clinic for Cardiovascular Diseases, Clinical Centre Kragujevac, Zmaj Jovina Street 30, 34000 Kragujevac, Serbia

<sup>d</sup>Department of Internal Medicine - Cardiology, Medical Faculty, University of Nis, Bulevar dr Zorana Djindjica 81, Nis, Serbia

<sup>i</sup>Clinic for Cardiovascular Diseases, Clinical Centre Nis, Bulevar dr Zorana Djindjica 48, Nis, Serbia

<sup>f</sup>School of Life Sciences, Faculty of Science, University of Technology Sydney, Sydney, PO Box 123 Broadway, NSW 2007, Australia

<sup>g</sup>Department of Pharmacology and Toxicology, Medical Faculty, University of Nis, Bulevar dr Zorana Djindjica 81, Nis, Serbia

<sup>h</sup>Institute of Biochemistry, Medical Faculty, University of Nis, Bulevar dr Zorana Djindjica 81, Nis, Serbia

**Declarations of interest:** None.

**Financial support:** This study funded by Faculty of Medicine, University of Nis, (Grant No INT-MF19), as well as Serbian Ministry of Education, Science and Techno-logical Development (Grant No III41018 and 44044).

**\*Reprints and correspondence:** Dr Rada M. Vučić; 00381631123610, email: [rada.vucic@gmail.com](mailto:rada.vucic@gmail.com); Milovana Gusica 8/15, 34000 Kragujevac, Serbia

Supplementary Figure 2. Schematic of the study events.

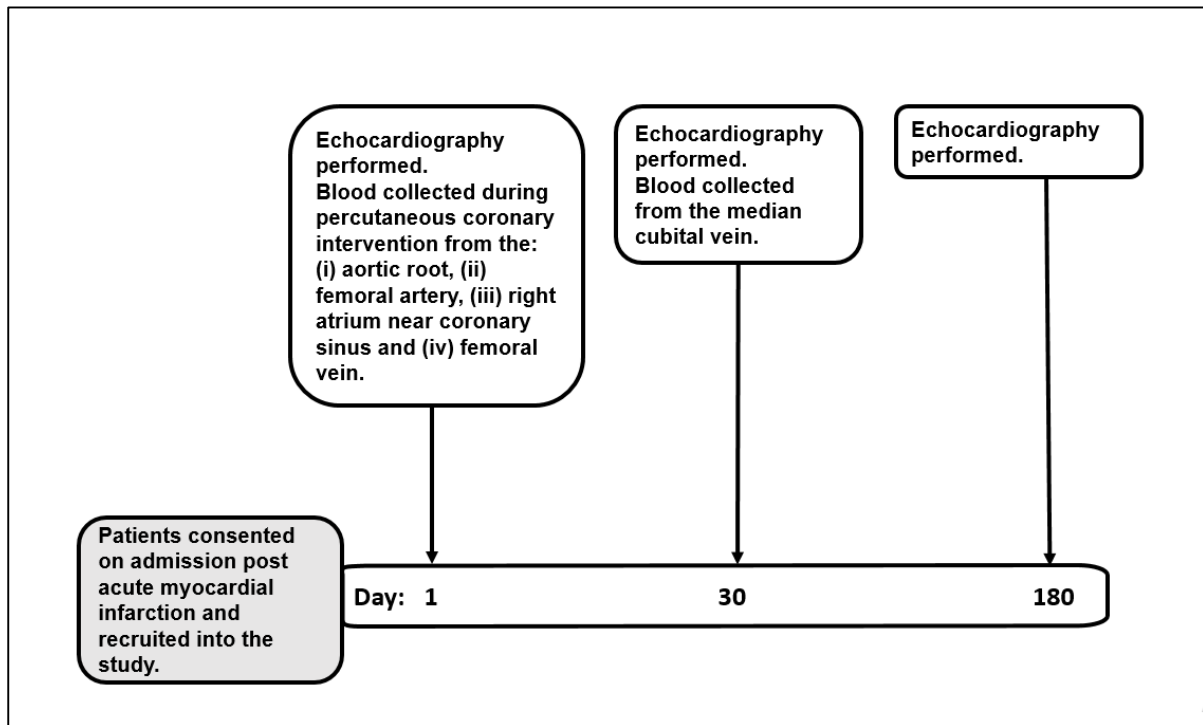

Supplement: 41598_2019_49511_MOESM2_ESM.pdf [file 41598_2019_49511_MOESM2_ESM.pdf]
